# Supplementary material for: Novel biodegradable poly(propylene fumarate)-co-poly(l-lactic acid) porous scaffolds fabricated by phase separation for tissue engineering applications
Source: Royal Society of Chemistry journal article supplement (doi:10.1039/c5ra00508f), 2015-01-01
Supplement: c5ra00508f1.pdf [file c5ra00508f1.pdf]

## Supporting information

# **Novel biodegradable poly(propylene fumarate)-*co*-poly(L-lactic acid) porous scaffolds fabricated by phase separation for tissue engineering applications**

Xifeng Liu,<sup>ab</sup> A. Lee Miller II,<sup>ab</sup> Brian E. Waletzki,<sup>ab</sup> Michael J. Yaszemski,<sup>ab</sup> and Lichun Lu<sup>\*ab</sup>

<sup>a</sup>Department of Orthopedic Surgery, Mayo Clinic, Rochester, MN 55905, USA.

<sup>b</sup>Department of Physiology and Biomedical Engineering, Mayo Clinic, Rochester, MN 55905, USA

Corresponding Author: \*Email: Lu.Lichun@mayo.edu

## **1. Experimental**

### **Synthesis of PPF polymer**

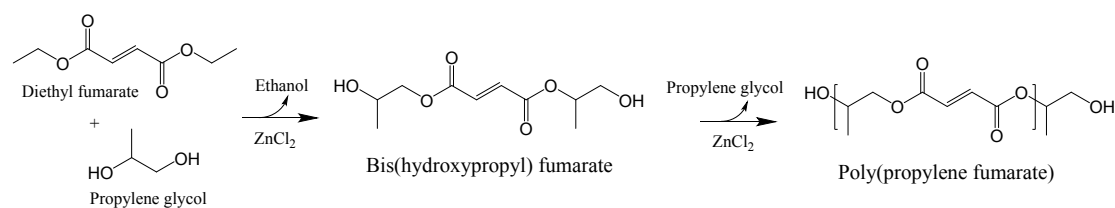

**Figure S1.** The synthesis route of PPF polymer for further copolymerization with L-lactide monomers.

## **2. Supplementary results**

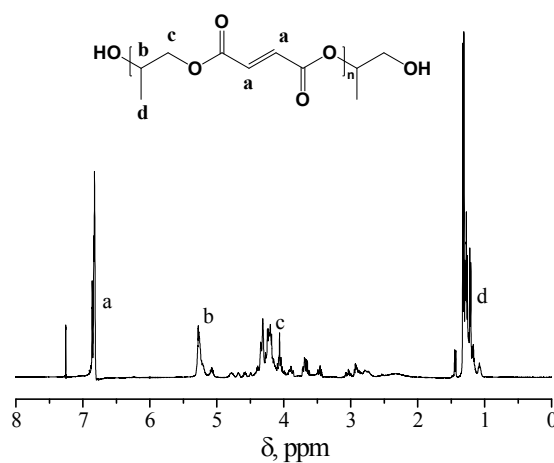

**Figure S2.** <sup>1</sup>H NMR for synthesized PPF polymer for further reaction with L-lactide monomers.

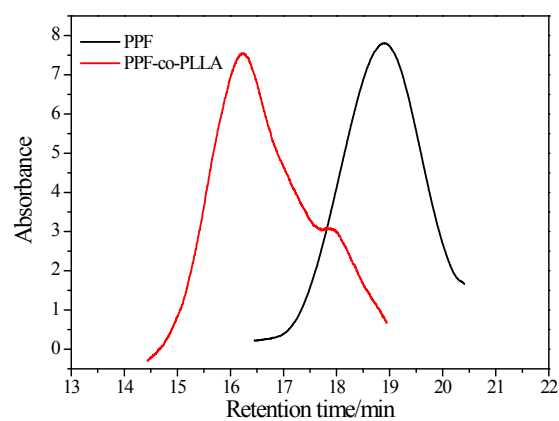

**Figure S3.** GPC chromatographs for PPF and PPF-*co*-PLLA polymers in THF eluent.

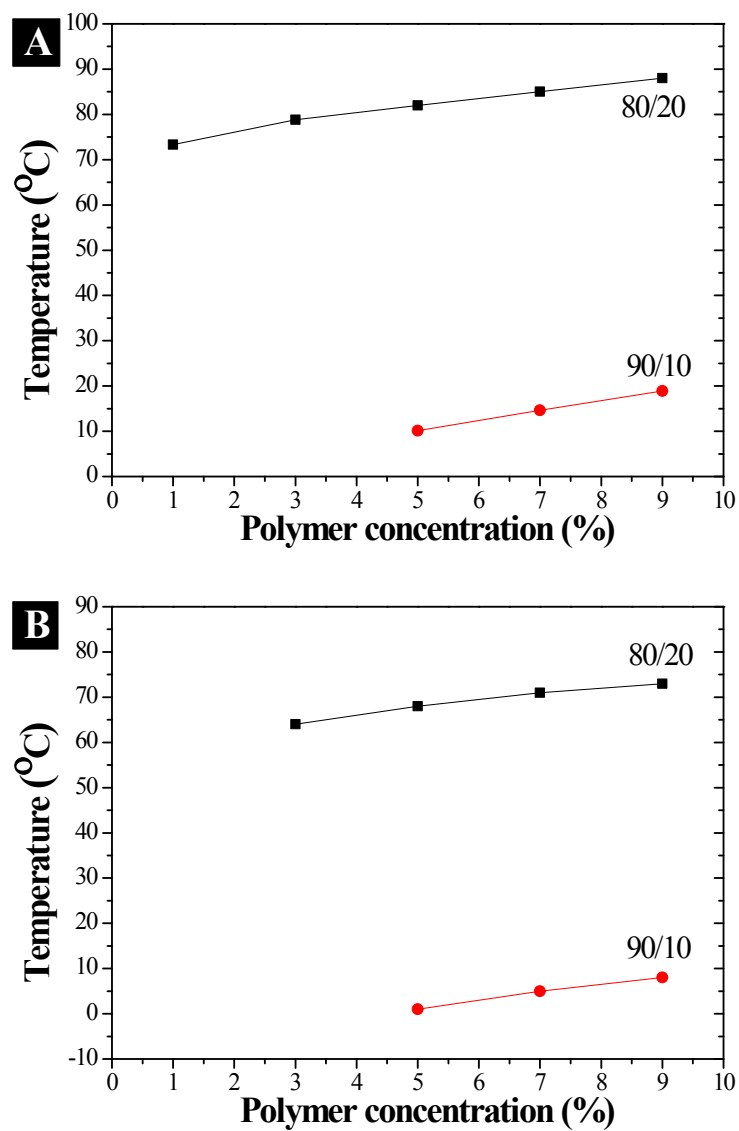

**Figure S4.** a) Cloud points, b) gelation temperature for PPF-*co*-PLLA polymer in dioxane/water with wt/wt ratios of 80/20 and 90/10.
